# Supplementary material for: Thermally stable NIR broad emission of Cr 3+ doping phosphor with a high output power
Source: Royal Society of Chemistry journal article supplement (doi:10.1039/d4qi01728e), 2024-01-01
Supplement: d4qi01728e1.pdf [file d4qi01728e1.pdf]

## Supporting Information

### Thermally Stable NIR Broad Emission of Cr<sup>3+</sup> Doping Phosphor With a High NIR Output Power

Zhishan Chen<sup>4</sup>, Shaoan Zhang<sup>2, 3\*</sup>, Zhenzhang Li<sup>2</sup>, Huacong Ye<sup>4</sup>, Haoran Yan<sup>2</sup>, Jialiong Xu<sup>4</sup>, Ling Gao<sup>1</sup>,  
Yang Li<sup>1, 3, 4\*</sup>, Shizhen Zhang<sup>1\*</sup>

<sup>1</sup>*Department of Neurosurgery and Neurosurgical Disease Research Centre, The Second Affiliated Hospital of Guangzhou Medical University, Guangzhou, 510006, China. E-mail: 18819805487@163.com*

<sup>2</sup>*School of Mathematics and Systems Science, Guangdong Polytechnic Normal University, Guangzhou, 510665, China.*

<sup>3</sup>*Institute of Light+X Science and Technology, Faculty of Electrical Engineering and Computer Science, Ningbo University, Ningbo, 315211, China. E-mail: [zsagdut2016@yeah.net](mailto:zsagdut2016@yeah.net), [lychris@sina.com](mailto:lychris@sina.com)*

<sup>4</sup>*School of Biomedical Engineering, Guangzhou Medical University, Guangzhou, 510006, China.*

Table S1 Main structural parameters of  $\text{YGa}_{1.5}\text{Al}_{1.5}(\text{BO}_3)_4:0.06\text{Cr}^{3+}$ .

|                      | ISCD<br>No. 91963 | $\text{YGa}_{1.5}\text{Al}_{1.5}(\text{BO}_3)_4$ | $\text{YGa}_{1.5}\text{Al}_{1.5}(\text{BO}_3)_4:0.06\text{Cr}^{3+}$ |
|----------------------|-------------------|--------------------------------------------------|---------------------------------------------------------------------|
| Space<br>Group       | R32H              | R32H                                             | R32H                                                                |
| a (Å)                | 9.342             | 3.961                                            | 9.360                                                               |
| b (Å)                | 9.342             | 3.961                                            | 9.360                                                               |
| c (Å)                | 7.325             | 7.338                                            | 7.339                                                               |
| Z                    | 3                 | 3                                                | 3                                                                   |
| $R_{\text{wp}}$ (%)  | --                | 7.68                                             | 7.65                                                                |
| $R_{\text{p}}$ (%)   | --                | 10.9                                             | 10.2                                                                |
| $R_{\text{exp}}$ (%) | --                | 4.35                                             | 4.75                                                                |

Table S2. Atomic coordinate parameters of  $\text{YGa}_{1.5}\text{Al}_{1.5}(\text{BO}_3)_4:0.06\text{Cr}^{3+}$ .

| Atom | $\text{YGa}_{1.5}\text{Al}_{1.5}(\text{BO}_3)_4$ |         |         |         | $\text{YGa}_{1.5}\text{Al}_{1.5}(\text{BO}_3)_4:0.06\text{Cr}^{3+}$ |         |         |         |
|------|--------------------------------------------------|---------|---------|---------|---------------------------------------------------------------------|---------|---------|---------|
|      | X                                                | Y       | Z       | Occ     | X                                                                   | Y       | Z       | Occ     |
| Y    | 0.00000                                          | 0.00000 | 0.00000 | 0.16819 | 0.00000                                                             | 0.00000 | 0.00000 | 0.16796 |
| Al   | 0.55309                                          | 0.00000 | 0.00000 | 0.31002 | 0.55367                                                             | 0.00000 | 0.00000 | 0.29279 |
| Ga   | 0.55309                                          | 0.00000 | 0.00000 | 0.25000 | 0.55367                                                             | 0.00000 | 0.00000 | 0.25000 |
| B1   | 0.00000                                          | 0.00000 | 0.50000 | 0.16667 | 0.00000                                                             | 0.00000 | 0.00000 | 0.16667 |
| B2   | 0.44411                                          | 0.00000 | 0.50000 | 0.50000 | 0.44725                                                             | 0.00000 | 0.50000 | 0.50000 |
| O1   | 0.85085                                          | 0.00000 | 0.50000 | 0.50000 | 0.85061                                                             | 0.00000 | 0.50000 | 0.50000 |
| O2   | 0.59015                                          | 0.00000 | 0.50000 | 0.50000 | 0.59070                                                             | 0.00000 | 0.50000 | 0.50000 |
| O3   | 0.45198                                          | 0.14709 | 0.51733 | 1.00000 | 0.45087                                                             | 0.14576 | 0.51907 | 1.00000 |

Table S3. PL properties of some Cr<sup>3+</sup>-doped NIR-emitting phosphors.

| Phosphors                                                                                  | PLQY | Relative PL intensity @temperature | Output power      | photoelectric conversion efficiency | Ref |
|--------------------------------------------------------------------------------------------|------|------------------------------------|-------------------|-------------------------------------|-----|
| Ca <sub>2</sub> YAl <sub>3</sub> Ge <sub>2</sub> O <sub>12</sub> :Cr <sup>3+</sup>         | 78%  | 85%@373 K                          | 33.3 mW @100 mA   | 11.5% @100 mA                       | S1  |
| Ca <sub>3</sub> Sc <sub>2</sub> Ge <sub>3</sub> O <sub>12</sub> :0.06Cr <sup>3+</sup>      | 81%  | 95%@423 K                          | 109.3 mW @300 mA  | 11.9%@300 mA                        | S2  |
| LuCa <sub>2</sub> ScZrGa <sub>2</sub> GeO <sub>12</sub> :Cr <sup>3+</sup>                  | 69%  | 64%@423 K                          | 37.88 mW @100 mA  | 12.44% @100 mA                      | S3  |
| Mg <sub>3</sub> Gd <sub>2</sub> Ge <sub>3</sub> O <sub>12</sub> :Cr <sup>3+</sup>          | 61%  | 45%@423 K                          | 23.2 mW @100 mA   | 8.45% @100 mA                       | S4  |
| KAIP <sub>2</sub> O <sub>7</sub> :Cr <sup>3+</sup>                                         | 79%  | 77%@423 K                          | 32.1 mW @100 mA   | 11.4% @100 mA                       | S5  |
| Mg <sub>2</sub> SnO <sub>4</sub> :Cr <sup>3+</sup>                                         | 77%  | 67%@423 K                          | 187.19 mW @100 mA | 13.67% @100 mA                      | S6  |
| KA <sub>0.4</sub> G <sub>0.6</sub> O:Cr                                                    | 89%  | 77%@423 K                          | 39.3 mW @100 mA   | 16.3% @100 mA                       | S7  |
| Sr <sub>3</sub> Al <sub>9.8</sub> SiO <sub>20</sub> :0.2Cr                                 | 68%  | 77%@380 K                          | 46.63 mW @100 mA  | 16.9% @100 mA                       | S8  |
| GdGa <sub>3</sub> (BO <sub>3</sub> ) <sub>4</sub> :15%Cr <sup>3+</sup>                     | 11%  | 94%@423 K                          | 6.45mW @120 mA    | 1.57% @120 mA                       | S9  |
| Mg <sub>3</sub> Lu <sub>2</sub> Ge <sub>3</sub> O <sub>12</sub> :Cr <sup>3+</sup>          | 49%  | 50%@398 K                          | 5.3 mW @20 mA     | 13.1% @20 mA                        | S10 |
| YGa <sub>1.5</sub> Al <sub>1.5</sub> (BO <sub>3</sub> ) <sub>4</sub> :0.06Cr <sup>3+</sup> | 86%  | 104%@423 K                         | 40.8 mW @100 mA   | 10.9% @100 mA                       | TW  |

Reference:

- S1. X. Dai, X. Zou, H. Zhang, W. Chen, C. Yang, M. S. Molokeev, Z. Xia, Y. Liu, X. Zhang, M. Zheng and B. Lei, Novel Cr<sup>3+</sup> - Doped Garnet Phosphor with Broadband Efficient Far - Red Emission for Photochrome Matching Plant - Lighting, *Adv. Opt. Mater.*, 2023, **12**, 2302380.
- S2. B. C. Wang, C. Yan, K. W. Shen, W. W. Lin, Y. G. Liu, R. Y. Mi and C. Zeng, Luminescence enhancement of Cr<sup>3+</sup> doped garnet phosphor for high-performance LED towards smart NIR light source, *Ceram. Int.*, 2023, **49**, 21864-21871.
- S3. J. Xie, J. Tian and W. Zhuang, Near-Infrared LuCa<sub>2</sub>ScZrGa<sub>2</sub>GeO<sub>12</sub>:Cr<sup>3+</sup> Garnet Phosphor with Ultra-broadband Emission for NIR LED Applications, *Inorg. Chem.*, 2023, **62**, 10772-10779.
- S4. C. Li, M. Sojka, J. Zhong and J. Brgoch, Non-destructive food-quality analysis using near-infrared luminescence from Mg<sub>3</sub>Gd<sub>2</sub>Ge<sub>3</sub>O<sub>12</sub>:Cr<sup>3+</sup>, *Dalton Trans.*, 2023, **52**, 12892-12898.
- S5. H. Zhang, J. Zhong, F. Du, L. Chen, X. Zhang, Z. Mu and W. Zhao, Efficient and Thermally Stable Broad-Band Near-Infrared Emission in a KAIP<sub>2</sub>O<sub>7</sub>:Cr<sup>3+</sup> Phosphor for Nondestructive Examination, *ACS Appl Mater Interfaces*, 2022, **14**, 11663-11671.
- S6. Z. Zhou, F. He, E. Song, S. Zhang, X. Yi, H. Zhang, Y. Le, S. Ye, S. Xu, J. Qiu and G. Dong, Broadband and Multimode Near - Infrared Emitter Based on Cr<sup>3+</sup> - Activated Stannate for Multifunctional Applications, *Adv. Opt. Mater.*, 2023, **11**, 2202466.
- S7. C. Dou, C. X. Cai, Z. Song and Q. L. Liu, Highly Quantum Efficient and Thermally Stable Near-Infrared-Emitting K-β-Al<sub>2</sub>O<sub>3</sub>:Cr<sup>3+</sup> Phosphor, *Adv. Opt. Mater.*, 2023, **12**, 2301579.
- S8. C. Dou, C. X. Cai, Z. Song and Q. L. Liu, Broadband Near-Infrared Sr<sub>3</sub>Al<sub>9.8</sub>SiO<sub>20</sub>:0.2Cr

Phosphor Realized by Crystallographic Site Engineering, *Inorg. Chem.*, 2023, **63**, 902-908.

- S9. S. Shao, X. Hu, D. Liu, F. Jin, Y. Peng, J. Wang, S. Lian and W. Zhou, Synthesis and luminescent properties of highly thermally stable  $\text{GdGa}_3(\text{BO}_3)_4:\text{Cr}^{3+}$  broadband near-infrared phosphors for near-infrared LED applications, *Ceram. Int.*, 2024, **50**, 30723-30729.
- S10. K. Jia, L. Nie, B. Wang, Z. Weng, X. Deng, Y. Yang and H. Ju, Broadband emitting  $\text{Mg}_3\text{Lu}_2\text{Ge}_3\text{O}_{12}:\text{Cr}^{3+}$  phosphors with garnet structure for high-performance NIR LEDs applications, *Ceram. Int.*, 2024, **50**, 23408-23418.
